# Supplementary material for: The effects of rhythm control strategies versus rate control strategies for atrial fibrillation and atrial flutter: A systematic review with meta-analysis and Trial Sequential Analysis
Source: PubMed Central journal article supplement (PMC5658096; doi:10.1371/journal.pone.0186856), 2017-10-26

| Study or Subgroup                                                                                           | Rhythm control |             | Rate control |             | Weight        | Risk Ratio               |
|-------------------------------------------------------------------------------------------------------------|----------------|-------------|--------------|-------------|---------------|--------------------------|
|                                                                                                             | Events         | Total       | Events       | Total       |               | M-H, Random, 95% CI      |
| AF-CHF 2008                                                                                                 | 20             | 682         | 72           | 694         | 18.1%         | 0.28 [0.17, 0.46]        |
| AFFIRM 2002                                                                                                 | 80             | 2033        | 77           | 2027        | 19.4%         | 1.04 [0.76, 1.41]        |
| CAMTAF 2014                                                                                                 | 1              | 28          | 4            | 27          | 5.7%          | 0.24 [0.03, 2.02]        |
| Fengsrud 2016                                                                                               | 0              | 17          | 0            | 19          |               | Not estimable            |
| Gillinov 2016                                                                                               | 1              | 261         | 4            | 262         | 5.5%          | 0.25 [0.03, 2.23]        |
| HOT CAFE 2004                                                                                               | 3              | 104         | 0            | 101         | 3.4%          | 6.80 [0.36, 130.00]      |
| Hu 2005                                                                                                     | 0              | 92          | 0            | 91          |               | Not estimable            |
| J-RHYTHM 2009                                                                                               | 9              | 419         | 11           | 404         | 14.3%         | 0.79 [0.33, 1.88]        |
| MacDonald 2011                                                                                              | 1              | 22          | 1            | 19          | 4.0%          | 0.86 [0.06, 12.89]       |
| PAF 2 2002                                                                                                  | 3              | 71          | 2            | 70          | 7.4%          | 1.48 [0.25, 8.58]        |
| PIPAF 2003                                                                                                  | 0              | 20          | 0            | 6           |               | Not estimable            |
| PIPAF 2003a                                                                                                 | 0              | 10          | 0            | 6           |               | Not estimable            |
| RACE 2002                                                                                                   | 21             | 266         | 14           | 256         | 16.5%         | 1.44 [0.75, 2.78]        |
| STAF 2003                                                                                                   | 5              | 100         | 1            | 100         | 5.7%          | 5.00 [0.59, 42.04]       |
| <b>Total (95% CI)</b>                                                                                       |                | <b>4125</b> |              | <b>4082</b> | <b>100.0%</b> | <b>0.84 [0.46, 1.53]</b> |
| Total events                                                                                                | 144            |             | 186          |             |               |                          |
| Heterogeneity: Tau <sup>2</sup> = 0.46; Chi <sup>2</sup> = 31.36, df = 9 (P = 0.0003); I <sup>2</sup> = 71% |                |             |              |             |               |                          |
| Test for overall effect: Z = 0.56 (P = 0.57)                                                                |                |             |              |             |               |                          |

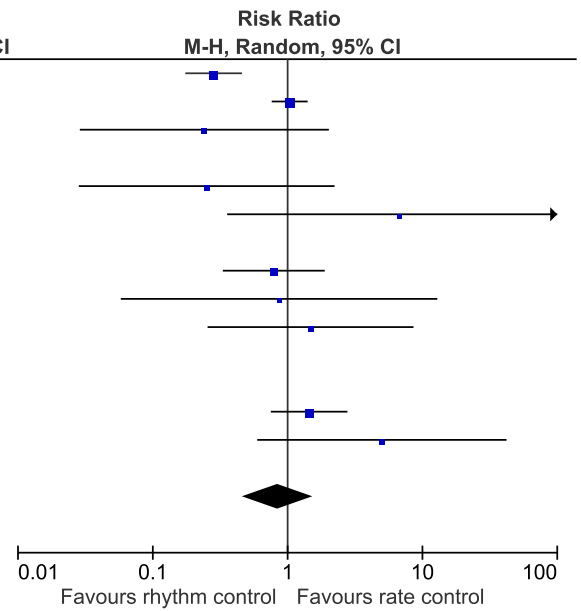

Supplement: pone.0186856.s031.pdf [file pone.0186856.s031.pdf]
