# Supplementary material for: The effects of rhythm control strategies versus rate control strategies for atrial fibrillation and atrial flutter: A systematic review with meta-analysis and Trial Sequential Analysis
Source: PubMed Central journal article supplement (PMC5658096; doi:10.1371/journal.pone.0186856), 2017-10-26

| Study or Subgroup                                                                                       | Rhythm control |             | Rate control |             | Weight        | Risk Ratio               |
|---------------------------------------------------------------------------------------------------------|----------------|-------------|--------------|-------------|---------------|--------------------------|
|                                                                                                         | Events         | Total       | Events       | Total       |               | M-H, Random, 95% CI      |
| AF-CHF 2008                                                                                             | 15             | 647         | 9            | 650         | 13.4%         | 1.67 [0.74, 3.80]        |
| AFFIRM 2002                                                                                             | 73             | 2033        | 67           | 2027        | 85.0%         | 1.09 [0.78, 1.50]        |
| PAF 2 2002                                                                                              | 1              | 68          | 2            | 69          | 1.6%          | 0.51 [0.05, 5.47]        |
| <b>Total (95% CI)</b>                                                                                   |                | <b>2748</b> |              | <b>2746</b> | <b>100.0%</b> | <b>1.14 [0.84, 1.54]</b> |
| Total events                                                                                            | 89             |             | 78           |             |               |                          |
| Heterogeneity: Tau <sup>2</sup> = 0.00; Chi <sup>2</sup> = 1.38, df = 2 (P = 0.50); I <sup>2</sup> = 0% |                |             |              |             |               |                          |
| Test for overall effect: Z = 0.84 (P = 0.40)                                                            |                |             |              |             |               |                          |

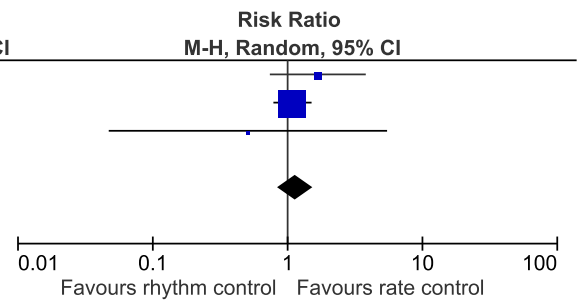

Supplement: pone.0186856.s010.pdf [file pone.0186856.s010.pdf]
