# Supplementary material for: The effects of rhythm control strategies versus rate control strategies for atrial fibrillation and atrial flutter: A systematic review with meta-analysis and Trial Sequential Analysis
Source: PubMed Central journal article supplement (PMC5658096; doi:10.1371/journal.pone.0186856), 2017-10-26

| Study or Subgroup                                                              | Rhythm control |             | Rate control |             | Weight        | Risk Ratio               |
|--------------------------------------------------------------------------------|----------------|-------------|--------------|-------------|---------------|--------------------------|
|                                                                                | Events         | Total       | Events       | Total       |               | M-H, Fixed, 95% CI       |
| AF-CHF 2008                                                                    | 36             | 647         | 37           | 650         | 78.7%         | 0.98 [0.63, 1.53]        |
| AFFIRM 2002                                                                    | 6              | 2033        | 9            | 2027        | 19.2%         | 0.66 [0.24, 1.86]        |
| HOT CAFE 2004                                                                  | 1              | 104         | 0            | 101         | 1.1%          | 2.91 [0.12, 70.71]       |
| PIAF 2000                                                                      | 1              | 122         | 0            | 124         | 1.1%          | 3.05 [0.13, 74.12]       |
| <b>Total (95% CI)</b>                                                          |                | <b>2906</b> |              | <b>2902</b> | <b>100.0%</b> | <b>0.96 [0.64, 1.43]</b> |
| Total events                                                                   | 44             |             | 46           |             |               |                          |
| Heterogeneity: Chi <sup>2</sup> = 1.46, df = 3 (P = 0.69); I <sup>2</sup> = 0% |                |             |              |             |               |                          |
| Test for overall effect: Z = 0.20 (P = 0.84)                                   |                |             |              |             |               |                          |

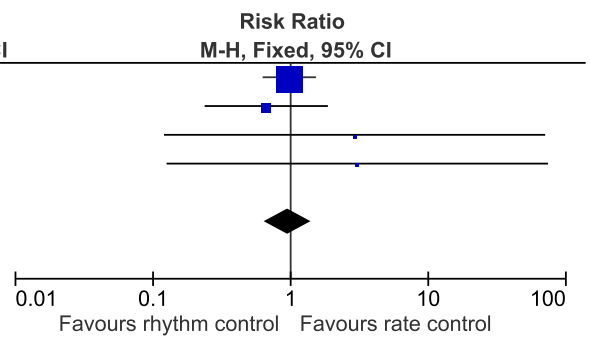

Supplement: pone.0186856.s012.pdf [file pone.0186856.s012.pdf]
