# Supplementary material for: The effects of rhythm control strategies versus rate control strategies for atrial fibrillation and atrial flutter: A systematic review with meta-analysis and Trial Sequential Analysis
Source: PubMed Central journal article supplement (PMC5658096; doi:10.1371/journal.pone.0186856), 2017-10-26

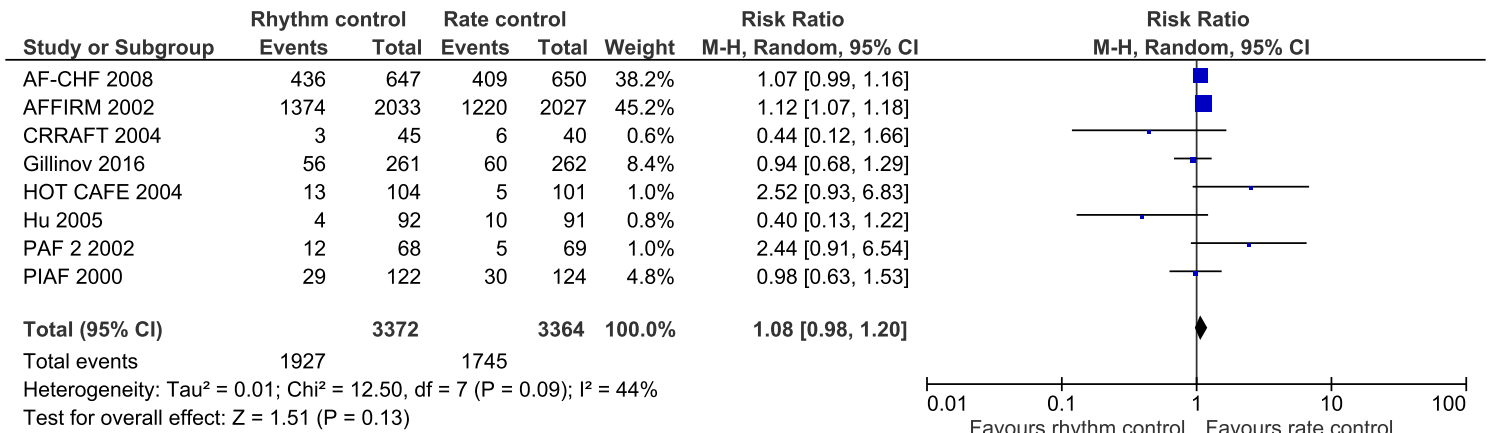

Supplement: pone.0186856.s013.pdf [file pone.0186856.s013.pdf]
