# Supplementary material for: The effects of rhythm control strategies versus rate control strategies for atrial fibrillation and atrial flutter: A systematic review with meta-analysis and Trial Sequential Analysis
Source: PubMed Central journal article supplement (PMC5658096; doi:10.1371/journal.pone.0186856), 2017-10-26

| Study or Subgroup     | Rhythm control |      |             | Rate control |      |             | Weight        | Mean Difference<br>IV, Random, 95% CI |
|-----------------------|----------------|------|-------------|--------------|------|-------------|---------------|---------------------------------------|
|                       | Mean           | SD   | Total       | Mean         | SD   | Total       |               |                                       |
| AF-CHF 2008           | 44.9           | 9.16 | 682         | 34.3         | 8.99 | 694         | 18.0%         | 10.60 [9.64, 11.56]                   |
| CAFÉ-II 2009          | 7.5            | 2.8  | 30          | -4.3         | 2.7  | 31          | 17.4%         | 11.80 [10.42, 13.18]                  |
| CAMTAF 2014           | 67.7           | 10.3 | 28          | 45.8         | 11.4 | 27          | 8.9%          | 21.90 [16.15, 27.65]                  |
| Hu 2005               | 71.7           | 27.8 | 92          | 58.5         | 30.5 | 91          | 5.6%          | 13.20 [4.74, 21.66]                   |
| MacDonald 2011        | 4.9            | 9.5  | 22          | -1.2         | 4.4  | 19          | 11.3%         | 6.10 [1.66, 10.54]                    |
| PIAF 2000             | 47.7           | 10.2 | 127         | 39           | 9.4  | 125         | 15.5%         | 8.70 [6.28, 11.12]                    |
| RACE 2002             | 72.5           | 26   | 266         | 53.6         | 25.1 | 256         | 11.4%         | 18.90 [14.52, 23.28]                  |
| STAF 2003             | 65.3           | 13.5 | 100         | 60.5         | 16.3 | 100         | 11.9%         | 4.80 [0.65, 8.95]                     |
| <b>Total (95% CI)</b> |                |      | <b>1347</b> |              |      | <b>1343</b> | <b>100.0%</b> | <b>11.42 [9.03, 13.81]</b>            |

Heterogeneity: Tau<sup>2</sup> = 8.04; Chi<sup>2</sup> = 45.12, df = 7 (P < 0.00001); I<sup>2</sup> = 84%  
 Test for overall effect: Z = 9.36 (P < 0.00001)

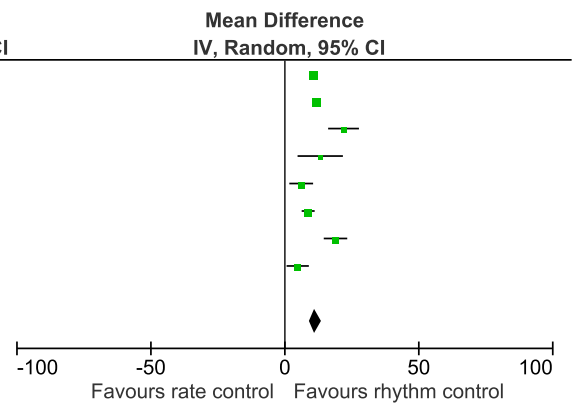

Supplement: pone.0186856.s026.pdf [file pone.0186856.s026.pdf]
